# 1 **Perturbation of GABA Biosynthesis Links Cell Cycle to** 2 **Control *Arabidopsis thaliana* Leaf Development**

3 **Yaxin Gong, Han Yue, Yu Xiang, Guanghui Yu\***

4 Hubei Provincial Key Laboratory for Protection and Application of Special Plants in  
5 Wuling Area of China, Engineering Research Centre for the Protection and Utilization  
6 of Bioresource in Ethnic Area of Southern China, College of Life Sciences,  
7 South-Central University for Nationalities, Wuhan 430074, China

8

9 **\* Correspondence:**

10 Guanghui Yu

11 [yuguanghui@scuec.edu.com](mailto:yuguanghui@scuec.edu.com)

12

13 **Keywords:** *Arabidopsis thaliana*; CDKA;1; endoreplication; GABA; Reactive  
14 Oxygen Species

15 **Running title:** Endoreplication response to GABA deficit

16 **Abstract**

17 To investigate the molecular mechanism underlying increasing leaf area in  
18  $\gamma$ -Aminobutyric acid (GABA) biosynthetic mutants, the first pair of true leaves of  
19 GABA biosynthetic mutants was measured. The results showed that the leaf blade  
20 area in GABA biosynthetic mutants was larger than that of the wild type to different  
21 extents, and the area of the leaf epidermal cells in mutants was larger than that of the  
22 wild type. DNA polyploid analysis showed that polyploid cells in GABA biosynthetic  
23 mutants were appearing earlier and more abundant than in the wild type. To check the  
24 correlation between cell size and endoreplication, the expression of factors involving  
25 endocycles, including D-type cyclin gene (*CYCD3;1*, *CYCD3;2*, *CYCD3;3*, and  
26 *CYCD4;1*) and kinase *CKDA;1*, were analysed by qRT-PCR. The results showed that  
27 *CKDA;1* in GABA biosynthetic mutants was downregulated, and four types of  
28 *CYCDs* showed different expression patterns in different GABA biosynthetic mutants.  
29 Inconsistent with this result, for *CCS52A* (*CELL CYCLE SWITCH 52A*) (controlling  
30 the endocycle entry) in *gad2* and *gad1/gad2* mutants, the expression of *CCS52A2* was  
31 significantly higher than that in the wild type. The expression of *SIM* (*SIAMESE*) and  
32 *SMR* (*SIAMESE-RELATED*), which inhibit kinase activity, were also upregulated  
33 compared with the control. To further study the possible potential relationship  
34 between GABA metabolism and endoreplication, we analysed the reactive oxygen  
35 species (ROS) levels in guard cells using ROS fluorescent probes. ROS levels were  
36 significantly higher in GABA biosynthetic mutants than the control. All results  
37 indicated that cyclin, the cyclin-dependent kinase, and its inhibitory protein were

## Endoreplication response to GABA deficit

38 coordinated to participate in endoreplication control at the transcription level in the  
39 leaves of GABA biosynthetic mutant *Arabidopsis*.

40

## Endoreplication response to GABA deficit

### 41 Contribution to the field statement

42  $\gamma$ -Aminobutyric acid (GABA) metabolic pathway plays a dual role in plant  
43 development. This research investigated the perturbation of GABA biosynthesis on  
44 *Arabidopsis* leave endoreplication for the first time. In the GABA biosynthetic  
45 mutants, many genes, participating in cell division regulation, are coordinately  
46 transcriptionally expressed to trigger the onset and maintenance of endoreplication,  
47 and this led to the cell expansion and the increase leaf blade area. However, this  
48 initiation of endoreplication links with the decrease of endogenous GABA level and  
49 the increase Reactive oxygen species (ROS). This may be a compensation mechanism  
50 to adapt to abnormal GABA level in plant leaf development. Present evidence  
51 provided hypothesized that the normal GABA level in plant leaf development plays a  
52 brake to inhibit the immature cell expansion and differentiation, and this negative  
53 regulation functions a guarantee mechanism to watchdog the normal leaf development.  
54 In all, this contribution provides an updated perspective on the role of GABA in plant  
55 development.

56

### 57 1 Introduction

58  $\gamma$ -Aminobutyric acid (GABA) is a four-C, non-protein component amino acid  
59 commonly found in organisms and is prevalent in bacteria, plants, and vertebrates  
60 (Seifikalhor et al., 2019). The precursor of GABA synthesis is L-glutamic acid (Glu),  
61 which is catalysed by glutamate decarboxylase (GAD) in cytoplasm. The *Arabidopsis*  
62 genome has five genes encoding GAD named GAD1–5. The oxidative metabolism of  
63 GABA occurs in mitochondria and entry is mediated by a GABA permease (Michaeli  
64 et al., 2011). In mitochondria, using  $\alpha$ -ketoglutarate or pyruvate as an amino acceptor,  
65 GABA is catalysed by GABA transaminase (GABA-T) to produce glutamic acid (Glu)  
66 or Alanine (Ala) and succinic semialdehyde (SSA), respectively. SSA is oxidized by  
67 SSA dehydrogenase (SSADH) to succinic acid (SucA), and then SucA enters the  
68 tricarboxylic acid (TCA) cycle for further metabolism. This metabolic pathway is  
69 referred to as the GABA shunt. Under hypoxic or high-light conditions, SSA can be  
70 reduced to gamma-hydroxybutyrate (GHB) by SSA reductase (SSR, also known as  
71 GHB dehydrogenase) in the cytoplasm, mitochondria, and chloroplasts (Allan et al.,  
72 2008). Previous studies have reported that unique cytosolic and plastid glyoxylate  
73 reductase isoforms in *Arabidopsis* are known as GLYR1 and atGLYR2, respectively,  
74 and they catalyse the conversion of SSA to GHB and glyoxylic acid to glycolic acid  
75 via an NADPH-dependent reaction (Brikis et al., 2017). The balance of the redox state  
76 was maintained by the accumulation of GHB and the reduction of SSA via the GABA  
77 shunt.

78 GABA biosynthesis and accumulation from the glutamic acid pathway and its  
79 metabolism are at the junction of N and C metabolism, providing a useful metabolic  
80 substrate for the TCA cycle, electron transport chain, and C skeleton, which are

## Endoreplication response to GABA deficit

81 involved in the balancing of C:N metabolism (Jacoby et al., 2011). It is generally  
82 believed that GABA metabolism is considered to be involved in metabolic signalling,  
83 which plays a dual role in plant development, including both metabolic and signal  
84 regulation (Häusler et al., 2014; Ramesh et al., 2017; Podlešáková et al., 2019). In  
85 addition, aldehyde chemical groups (i.e. H–C=O) produced by GABA biosynthesis  
86 and metabolic pathways in plants have high molecular activity, and aldehydes  
87 accumulated under stressed conditions are highly toxic and can react with DNA, lipids  
88 of oxidative membranes, and modified proteins, or affect the transcription of  
89 stress-related genes, leading to cellular and ontogenetic problems in plants. Previous  
90 studies have reported that GABA metabolism regulates leaf pattern morphogenesis.  
91 The SSADH gene is involved in the formation of the paraxial–abaxial (upper–lower)  
92 leaf model in *Arabidopsis thaliana* (Toyokura et al., 2011; 2012). Mutation of *enfl*  
93 (*enlarged fil expression domain1*) alters the expression pattern of the *FIL* (*YABBY1*,  
94 *FILAMENTOUS FLOWER*) gene, which is characteristic of meristem and organs in *A.*  
95 *thaliana* (Sawa et al., 1999), on the abaxial surface of leaf primordium (Sawa et al.,  
96 1999; Siegfried et al., 1999). However, here is a dearth of research on the role of  
97 GABA biosynthesis in the leaf development of *A. thaliana*. In the present study,  
98 GABA biosynthetic mutants, *gad1*, *gad2*, and *gad1/gad2* were examined to explore  
99 the molecular mechanism underlying the GABA negative feedback that regulates leaf  
100 cell endoreplication during leaf development. Our findings will provide evidence for  
101 further understanding the role of GABA in plant development.

## 102 2 Materials and methods

### 103 2.1 Experimental Materials

104 *A. thaliana* Col wild-type seeds, Col ecotype *gad1* mutant, *gad2* mutant, and  
105 *gad1/gad2* double mutant were provided by Prof. Barry Shelp (University of Guelph,  
106 Canada). The seeds of the wild type and mutants were sterilized for ~2 h in a sealed  
107 container with chlorine gas, and then inoculated on MS solid medium and  
108 synchronized for 3 d at 4 °C. After synchronization, the plate was taken out and  
109 placed in greenhouse under a photoperiod of 16/8 h light/dark and incubated at 22 °C.

### 110 2.2 Measurement of leaf blade area

111 From the 4<sup>th</sup> day after *A. thaliana* seedlings being transferred to the greenhouse, their  
112 growth condition was photographed every 24 h with a Brinno time-lapse camera  
113 (TLC100) at a fixed distance to record the leaf blade area.

### 114 2.3 Microscopic observation and measurement of cell area

115 From the 7<sup>th</sup> day after *A. thaliana* seedlings being transferred to the greenhouse, the first  
116 pair of true leaves was collected daily, the leaf abaxial epidermis located 25% and 75%  
117 from the distance between the tip and the base of the leaf blade was photocopied with  
118 nail polish, and then photographed using an Olympus DP80 microscope, and the area  
119 was calculated with the software that came with the microscope. Under the microscope,  
120 a certain area of the epidermis was confined to count the number of cells, and then the  
121 average cell area was calculated.

### 122 2.4 DNA ploidy analysis

## Endoreplication response to GABA deficit

123 Approximately two or three leaves at the young stage or one or two leaves at the  
124 middle and late leaf developmental stages were chopped with a razor blade in nuclei  
125 extraction buffer (CyStain<sup>®</sup> UV Precise P, Sysmex Partec), and then transferred to the  
126 staining buffer (CyStain<sup>®</sup> UV Precise P, Sysmex Partec) according to the  
127 manufacturer's instructions. The ploidy level of DNA in leaf cells was determined  
128 using a CyFlow Ploidy Analyser (Sysmex Partec).

### 129 2.5 qRT-PCR analysis

130 Total RNA from *A. thaliana* leaves was extracted by AxyPrep Multisource Total  
131 RNA Miniprep Kit (Axygen Science, Inc). Reverse transcription was performed by  
132 Goldenstar RT6 Gene Synthesis Kit (Tingke Biotechnology Co., Ltd.) with a reverse  
133 transcription reaction system of 20  $\mu$ L. qRT-PCR analysis was performed by MyGo  
134 Pro qPCR System (IT-IS Life Science Ltd.). The gene *isoprenyl diphosphate delta*  
135 *isomerase II* (*IPP2*, AT3G02780) was selected as the internal reference gene  
136 according to previous research (Fung-Uceda et al., 2018). The primers of the genes  
137 involved in cell cycle regulation, endocycle initiation, progression, and exit are listed  
138 in the supporting materials (Table S1).

### 139 2.6 *In vivo* reactive oxygen species imaging

140 For GC reactive oxygen species (ROS) staining, H2DCF-DA stock solution (10  
141 mmol/L stock in Dimethyl Sulfoxide) was diluted in deionized water to yield a final  
142 concentration of 6.25  $\mu$ mol/L with a final dimethyl sulfoxide concentration of  
143 0.0125% (v/v) (Watkins et al., 2017). Epidermal strips were peeled with adhesive tape  
144 and directly stained for 30 min in the above solution. After rinsing with deionized  
145 water for 5 min, images were taken by Olympus DP80 fluorescent microscopy. The  
146 intensity of coloration was quantified using ImageJ software (National Institutes of  
147 Health, USA).

### 148 2.7 Statistical analyses

149 Data are expressed as averages  $\pm$  standard error (SE). Experiments were conducted  
150 with two or three independent replicates. One-way ANOVA was employed using  
151 SPSS 20.0.

## 152 3 Results

### 153 3.1 The leaf blade area of the GABA biosynthetic mutant was larger than that 154 of the wild type

155 At the early stage of leaf development (4<sup>th</sup> day after stratification), there was no  
156 significant difference in the area of the first pair of true leaves between the wild-type  
157 and GABA biosynthetic mutants (Figure 1). As time progressed, the area of the  
158 mutant leaves increased more rapidly than that of the wild type. Around the 8<sup>th</sup> day,  
159 the leaf area of the first pair of true leaves in the wild type was about 1.8 mm<sup>2</sup>, and the  
160 first pair of true leaves in *gad1* and *gad2* mutants was about 2.4 mm<sup>2</sup>, at 1.3-fold that  
161 of the wild type, and that of the *gad1/gad2* mutants was about 3.2 mm<sup>2</sup> with 1.8-fold  
162 that of the wild type (Figure 1). The leaf area between the GABA biosynthetic  
163 mutants and wild type was significantly different ( $P < 0.05$ ).

## Endoreplication response to GABA deficit

### 164 3.2 Cell size in GABA biosynthetic mutants was larger than those of the wild 165 type

166 To determine the reasons for the leaf area in GABA biosynthetic mutants being larger  
167 than that in the wild type, we compared the area of leaf epidermal cells. The average  
168 cell area in the epidermis of the first pair of true leaves of the wild type was about  
169  $2700 \mu\text{m}^2$  at the 8<sup>th</sup> day after stratification (Figure 2). The average cell area of the  
170 epidermis of the first pair of leaves of *gad1* and *gad2* mutants was  $\sim 3200 \mu\text{m}^2$ ,  
171 1.2-fold that of the wild type ( $P < 0.05$ ). The average cell area of the epidermis of the  
172 first pair of true leaves in *gad1/gad2* mutants was  $\sim 3800 \mu\text{m}^2$ , and was 1.4-fold that of  
173 the wild type with significant differences ( $P < 0.05$ ) (Figure 2).

### 174 3.3 The polyploidy in GABA biosynthetic mutant leaf occurred earlier and 175 higher than that of the wild type

176 The correlation between cell size and DNA ploidy level (Matsunaga et al., 2013)  
177 prompted us to explore whether the cell size of GABA biosynthetic mutants is related  
178 to DNA polyploidy level. On the 7<sup>th</sup> day of leaf development after stratification, the  
179 cells in the first pair of true leaves in wild-type *A. thaliana* were mostly diploid and  
180 tetraploid, indicating that leaf cells mainly divided at this stage (Figure 3A). However,  
181 leaf cells in *gad1*, *gad2*, and *gad1/gad2* mutants appeared to be in different  
182 proportions of 8-ploid cells except the diploid and tetraploid cells (Figure 3B). The  
183 appearance of 8-ploid cells in leaves is a marker of endoreplication. On the 8<sup>th</sup> day of  
184 leaf development, 8-ploid cells were not found in wild-type *A. thaliana*, and the  
185 proportion of octoploid cells in three kind of GABA-biosynthetic mutants increased  
186 further (Figure 3B).

187 To further confirm the relationship between cell enlargement and cell ploidy level, we  
188 compared the cell ploidy level in the middle and late leaf development stages (21<sup>st</sup> day  
189 after stratification). The proportion of octoploid cells in the wild type was about 18%  
190 (Figure 3C). However, the proportion of the octoploid cells in *gad1*, *gad2*, and  
191 *gad1/gad2* mutants was about 30–40%, which was significantly higher than that in the  
192 wild type (Figure 3C).

193 Overall, at the early stage of leaf development (7–8<sup>th</sup> day after stratification), the  
194 8-ploid cells were only detected in the GABA biosynthetic mutants (8-ploid cells in  
195 *gad1* and *gad2* mutants was 3–5%, and that in *gad1/gad2* double mutants was about  
196 5–9%) (Figure 3D). At the late stage of leaf development (21<sup>st</sup> day after stratification),  
197 the proportion of 8-ploid cells in wild-type leaves was also detected; however, its  
198 level was significantly lower than that in *gad* mutants (Figure 3D).

### 199 3.4 Type-D cyclin genes involved in endocycle regulation in GABA biosynthetic 200 mutants

201 Considering that endoreplication is a special form of cell division (De Veylder et al.,  
202 2011) and is the reason for cell polyploidy (Matsunaga et al., 2013), type-D relative  
203 gene participation in cell cycle regulation was analysed by qRT-PCR.

204 *CYCD3;1* (At4g34160) is a key component to balance cell proliferation/division and  
205 endoreplication (Dewitte et al., 2007). Downregulation of *CYCD3;1* can lead to

## Endoreplication response to GABA deficit

206 endoreplication, and its overexpression can cause excessive cell proliferation and  
207 inhibit cell differentiation (Dewitte et al., 2003). qRT-PCR confirmed that the  
208 expression of *CYCD3;1* was significantly downregulated in GABA biosynthetic  
209 mutants (Figure 4). In *gad1* and *gad2* single mutants, the relative expression of  
210 *CYCD3;1* was about 0.2-fold that of the wild type ( $P < 0.01$ ), and in *gad1/gad2*  
211 double mutants, the relative expression of *CYCD3;1* was about 0.1-fold that of the  
212 wild type ( $P < 0.01$ ) (Figure 4), indicating that blocking GABA synthesis inhibited the  
213 expression of *CYCD3;1*.

214 *CYCD3;2* (At5g67260) and *CYCD3;3* (At3g50070) participate in the symmetrical  
215 division of guard mother cells and guard cells (GCs) in the late stomatal lineage  
216 development (Yang et al., 2014). In the *gad1* mutant, the expression of *CYCD3;2* was  
217 significantly downregulated ( $P < 0.05$ ); in the *gad2* and *gad1/gad2* mutants, the  
218 relative expression of *CYCD3;2* was about 0.6-fold that of the wild type with  
219 significant differences ( $P < 0.01$ ) (Figure 4). Similarly, the expression of *CYCD3;3* in  
220 the *gad1* mutant was about 0.3-fold that of the wild type ( $P < 0.01$ ), and in the *gad2*  
221 and *gad1/gad2* mutants, the expression of *CYCD3;3* was 0.7 and 0.5-fold that of the  
222 wild type, respectively ( $P < 0.05$ ) (Figure 4). *CYCD4;1* (At5g65420) could activate  
223 the cell cycle of root apical meristem (Masubelele et al., 2005), and the expression of  
224 *CYCD4;1* in the *gad2* mutant was significantly downregulated ( $P < 0.05$ ), and in the  
225 *gad1* and *gad1/gad2* mutants the relative expression of *CYCD4;1* decreased to  
226 become the most significantly different to that of the wild type ( $P < 0.01$ ) (Figure 4).

### 227 3.5 The expression of *CDKA;1* in GABA biosynthetic mutants was significantly 228 downregulated

229 *CDKA;1* (At3g48750) is one of the core components of cell cycle regulation, mainly  
230 controlling the transition of the G1/S and G2/M mitotic phase (Nowack et al., 2012).  
231 Inhibition of its activity can block mitosis to initiate leaf cell endoreplication (Verkest  
232 et al., 2005). The expression of *CDKA;1* in GABA biosynthetic mutants was  
233 significantly lower than that in the wild type ( $P < 0.05$ ). These results indicated that  
234 blocking GABA synthesis is linked with the decreased expression of *CDKA;1* (Figure  
235 5).

236 The transcription factor *E2Fa* (At2g36010) stimulates cell proliferation and delayed  
237 differentiation (Boudolf et al., 2004). In the *gad1* and *gad2* mutants, the expression of  
238 *E2Fa* was significantly downregulated ( $P < 0.05$ ). In *gad1/gad2*, the level of *E2Fa*  
239 was 0.2-fold that in the wild type ( $P < 0.01$ ) (Figure 5).

### 240 3.6 Different expression patterns of *CCS52A2* and *CDC6* were observed in 241 GABA synthetic mutants

242 *CCS52A2* (*CELL CYCLE SWITCH52*, At4g11920) encodes a ubiquitin ligase  
243 regulating cell cycle division phase (M) and a substrate-specific activator of anaphase  
244 promotion complex/cyclosome (Fülöp et al., 2005). Inhibition of kinase activity after  
245 *CCS52A2* expression and enhancement of its activity are prerequisites for  
246 endoreplication (Heyman et al., 2017; Umeda et al., 2019). Mutations in the *CCS52*  
247 gene resulted in delayed endoreplication, and its overexpression resulted in increased  
248 DNA ploidy levels (Heyman et al., 2017). In the *gad1* mutant, the relative expression  
249 of *CCS52A2* was not different from that of the wild type; however, in the *gad2* and

## Endoreplication response to GABA deficit

250 *gad1/gad2* mutants, the expression of *CCS52A2* was significantly higher than that of  
251 the wild type ( $P < 0.05$ ) (Figure 6).

252 *CDC6* (At2g29680) encodes a homolog of cell division regulatory protein 6  
253 (Castellano et al., 2001), which is a license gene for DNA replication (Fung-Uceda et  
254 al., 2018). *CDC6* participates in the initiation of DNA replication and is an important  
255 factor for maintaining endoreplication. The ectopic expression of *CDC6* can increase  
256 the ploidy level caused by endoreplication (Castellano et al., 2001; 2004). In the *gad1*  
257 mutant, the relative expression of *CDC6* was 1.7-fold as much as that in the wild type  
258 ( $P < 0.05$ ) (Figure 6). The expression of *CDC6* in the *gad2* mutant was about 3-fold  
259 that in the wild type ( $P < 0.01$ ), and the expression of *CDC6* in the *gad1/gad2* double  
260 mutant was about 8-fold that in the wild type ( $P < 0.01$ ) (Figure 6).

### 261 3.7 The expression of *SIAMESE* and *SIAMESE-RELATED* in GABA 262 biosynthetic mutants was significantly up-regulated

263 *SIAMESE* (*SIM*, At5g04470) is an inhibitory protein of cyclin-dependent kinase and  
264 a regulator of mitotic inhibition and endoreplication (Churchman et al., 2006).  
265 Overexpression of *SIM* results in dwarfing of plants, serrated leaves, and cells with  
266 higher nuclear DNA content (Churchman et al., 2006). The relative expression of the  
267 *SIM* in *gad1* single mutant is about twice that of the wild type ( $P < 0.05$ ), in the *gad2*  
268 single mutant is about 4-fold that of the wild type ( $P < 0.05$ ), and in the *gad1/gad2*  
269 double mutant is about 7-fold that of the wild type ( $P < 0.01$ ) (Figure 7).

270 Most components of the *SIAMESE-RELATED* (*SMR*) gene family function in mitosis  
271 inhibition and endocycle promotion (Yi et al., 2014; Kumar et al., 2015; Dubois et al.,  
272 2018). In the chosen genes, the expression of *SMR1* (At3g10525) in *gad1* and *gad2*  
273 mutants was not different to that of the wild type. In the *gad1/gad2* mutants, its  
274 expression is 1.5-fold that of the wild type ( $P < 0.05$ ) (Figure 7). However, the  
275 expression of other components, *SMR2* (At1g08180), *SMR5* (At1g07500), and *SMR8*,  
276 was markedly different to that of the wild type (Figure 7). The expression of *SMR2* in  
277 *gad1*, *gad2*, and *gad1/2* reached 5-, 6-, and 11-fold of that in the wild type,  
278 respectively ( $P < 0.01$ ). Similarly, the expression of *SMR5* in *gad1*, *gad2*, and *gad1/2*  
279 reached 3-, 5-, and 17-fold that in the wild type ( $P < 0.01$ ), respectively, and  
280 the expression of *SMR8* in *gad1*, *gad2*, and *gad1/2* reached 4-, 4- ( $P < 0.05$ ), and  
281 6-fold that in the wild type ( $P < 0.01$ ), respectively.

### 282 3.8 The level of ROS in leaves of GABA biosynthetic mutant was higher than 283 that of the wild type

284 The fact that redox regulates cell proliferation and the cell cycle (Schippers et al.,  
285 2016), and GABA could scavenge ROS (Liu et al., 2011; Seifikalhor et al., 2019), led  
286 us to postulate that ROS levels in GABA biosynthetic mutants could be increased.  
287 Imaging of H<sub>2</sub>DCFDA (DCFH-DA; 2', 7'-Dichlorodihydrofluorescein diacetate) with  
288 the fluorescent probe of ROS showed that the average ROS level intensity in GCs of  
289 *gad* mutants was higher than that in the wild type ( $P < 0.05$ ) (Figure 8). These results  
290 suggest that GABA synthetic mutants are indeed correlated with ROS accumulation.

## 291 4 Discussion



## Endoreplication response to GABA deficit

292 The GABA metabolic pathway plays a dual role during plant development, including  
293 metabolic and signal regulation (Bown & Shelp, 2016; Seifikalhor et al., 2019).  
294 Abnormal GABA biosynthesis and metabolism have important effects on plant  
295 development (Baum et al., 1996; Palanivelu et al., 2003; Renault et al., 2013). The  
296 expression of the *Petunia* GAD gene, which lacked the calmodulin-binding domain in  
297 transgenic tobacco, resulted in abnormal plant development, which was shorter and  
298 more branched than that of normal plants (Baum et al., 1996). In the Arabidopsis  
299 *GABA-T* (*pop2-1*) mutant, the growth of pollen tubes could not accurately target the  
300 ovule sac in the pistils (Palanivelu et al., 2003). The molecular mechanism was related  
301 to the destruction of the gradient distribution of GABA in the stigma of the pistils  
302 (Palanivelu et al., 2003). Furthermore, the growth retardation in hypocotyl epidermal  
303 cells and root cortex cells is related to the limitation of cell elongation (Renault et al.,  
304 2011), and inadequate expression of *GABA-T* may lead to developmental defects in  
305 roots and hypocotyls and composition change in cell walls (Renault et al., 2013).

306 In the present study, the molecular mechanism underlying leaf-area enlargement in  
307 GABA biosynthetic mutants was investigated. The growth of plant leaves is largely  
308 limited by the development of the epidermis. Polyploidy in pavement cells is strongly  
309 correlated with cell size ( $P < 0.01$ ) (Melaragno et al., 1993). We confirmed that the  
310 larger leaf area and cell size in GABA biosynthetic mutants (Figures 1, 2) was related  
311 to much higher percentages of polyploid cells in GABA biosynthetic mutant leaves,  
312 which occurred earlier and in higher abundance than that of the wild-type leaf cells  
313 (Figure 3).

314 Endoreplication is a special kind of cell division (De Veylder et al., 2011), and the  
315 essence of endoreplication is to maintain CDK activity below the threshold that  
316 triggers mitosis (De Veylder et al., 2011). During leaf development of *A. thaliana*, the  
317 decrease in transcription levels of mitotic CDK and cyclin genes resulted in  
318 endoreplication (Beemster et al., 2006). Consistent with these results, the qRT-PCR  
319 analysis confirmed that the type-D cyclin genes (*CYCD3;1*, *CYCD3;2*, *CYCD3;3*, and  
320 *CYCD4;1*) were differently downregulated in GABA biosynthetic mutants, and the  
321 expression of *CDKA;1* exhibited a decreasing expression trend (Figures 4, 5).

322 Other factors interrelated with endoreplication regulation, from endoreplication  
323 initiation, progression, and maintenance, and exit (Breuer et al., 2014), synergistically  
324 regulate the occurrence of endoreplication in the leaves of GABA biosynthetic  
325 mutants. *CCS52A* (*CELL CYCLE SWITCH 52A*) plays an important role in cell cycle  
326 exit and endoreplication entry (Lammens et al., 2009; Vlieghe et al., 2005). The  
327 concentration of *CCS52A* in mitotic cells remains below a critical threshold to prevent  
328 immaturely initiating endoreplication (Lammens et al., 2009; Vlieghe et al., 2005). In  
329 the *gad2* and *gad1/gad2* mutants, the relative expression of *CCS52A2* was  
330 significantly higher than that of the wild type (Figure 6). The expression of  
331 cyclin-dependent kinase inhibitor *SIM* (*SIAMESE*) and its *SMR* (*SIAMESE-RELATED*)  
332 was significantly higher than that of the control (Figure 7). These results demonstrated  
333 that the endoreplication regulators, including cyclin, cyclin-dependent kinase, and  
334 kinase inhibitor, at the transcriptional level, all harmoniously contributed to the  
335 regulation of endoreplication in mutants.

336 It is worth noting that *SMR5*, a member of *SMR* (*SIAMESE-RELATED*), is an  
337 ROS-induced gene, which is more highly expressed in GABA biosynthetic mutants

## Endoreplication response to GABA deficit

338 (3–17-fold that of the control) (Figure 7). ROS is an important signalling molecule  
339 regulating leaf development and is involved in triggering endoreplication (Schippers  
340 et al., 2016). Previous evidence proved that exogenous GABA could scavenge ROS  
341 (Liu et al., 2011), and the GABA level in mutants was much lower than that in the  
342 wild type (Figure S1); thus, we speculated that the perturbation of GABA biosynthesis  
343 may be intrinsically linked with the ROS level. Detection using an ROS fluorescence  
344 probe confirmed that the level of ROS in GCs of GABA biosynthesis mutants was  
345 significantly higher than that in the control (Figure 8). Therefore, we speculated that  
346 blocking the GABA metabolic shunt pathway will lead to the accumulation of ROS  
347 intermediates (Bouché et al., 2003; Fait et al., 2005), which may trigger  
348 endoreplication (Figure 9). In this hypothesis, normal GABA metabolism functioned  
349 as a signal and antioxidant to effectively inhibit the production of ROS. In the GABA  
350 biosynthetic mutants, this inhibition was relieved. The production of ROS promotes  
351 the expression of *SIAMESE* (*SIM*) and *SIAMESE-RELATED* (*SMR*) expression, of  
352 which, their encoding products inhibited kinase activity to initiate endoreplication  
353 (Figure 9). In contrast, normal GABA metabolism postponed endoreplication, and this  
354 negative regulation functions to prevent premature cell differentiation and to ensure  
355 normal leaf development. However, this conclusion must be made cautiously because,  
356 based on current data, it is difficult to demonstrate a causal relationship between  
357 GABA level and ROS in terms of triggering endoreplication during the development  
358 of Arabidopsis leaves.

359 Overall, the results of the present study demonstrate that the increase in polyploidy  
360 level in GABA biosynthetic mutant leaves is achieved through endoreplication, which  
361 is reflected in the increase in average cell size (Breuer et al., 2010). In this regulation,  
362 multiple regulators are involved in the initiation, maintenance, and exit of  
363 endoreplication. However, the premature termination of mitosis and the immature  
364 occurrence of endoreplication are perhaps a compensatory mechanism for leaf  
365 immature development, which resulted in increased cell ploidy. This mechanism may  
366 be mediated by ROS signalling, but the complex regulatory mechanism requires  
367 further research.

## 368 5 Conclusion

369 Using GABA biosynthetic mutants, the present study focused on the perturbation of  
370 GABA biosynthesis on endoreplication in Arabidopsis leaf development. The  
371 endoreplication cells that occurred in mutants were earlier and of higher abundance  
372 than those in the wild type. This is the reason to lead to the increase in cell size and  
373 leaf blade area. For transcription-level regulation, qRT-PCR confirmed that many  
374 genes involved in cell cycle regulation were synergistically participating in the  
375 initiation, progression, and maintenance of endoreplication. Among the regulators,  
376 *SMR5*, encoding protein inhibited CDK activity, was markedly upregulated in GABA  
377 biosynthetic mutants. Owing to the perturbation of GABA biosynthesis, the content of  
378 ROS increased in GABA biosynthetic mutants, which is a potential signal to trigger  
379 endoreplication in mutant leaves. Present evidence indicates that normal GABA  
380 metabolism inhibited endoreplication to prevent immature cell differentiation in leaf  
381 development. This research provides a deeper understanding of the role of GABA in  
382 plant development.

## 383 6 Acknowledgments

## Endoreplication response to GABA deficit

384 We apologize if we inadvertently omitted citations of major contributions to this area.  
385 We thank Prof. Barry Shelp (University of Guelph, Canada) for generously providing  
386 the mutants seeds. We would like to thank Editage ([www.editage.cn](http://www.editage.cn)) for English  
387 language editing.

### 388 **7 Author Contributions**

389 YX studied the root phenotype in relation to GABA metabolism and wrote the draft of  
390 the manuscript. CLL studied the role of ROS in cell-cycle regulation. GHY studied  
391 the role of small molecules in plant development and revised the manuscript.

### 392 **8 Conflict of Interest**

393 The authors declare that the research was conducted in the absence of any commercial  
394 or financial relationships that could be construed as a potential conflict of interest.

### 395 **9 Funding**

396 This work was supported by the Special Fund for Basic Scientific Research of Central  
397 Colleges, South-Central University for Nationalities (CZP17051), National Natural  
398 Science Foundation of China (31270361), studies on the regulation mechanisms of  
399 agronomic traits in important crops and *A. thaliana* supported by State Administration  
400 of Foreign Experts Affairs in Ministry of Science and Technology of the People's  
401 Republic of China (P193009007) and Fund for Key Laboratory Construction of Hubei  
402 Province (Grant No.2018BFC360).

### 403 **10 Data Availability Statement**

404 No datasets were generated for this study.

### 405 **11 References**

406 Allan WL, Simpson JP, Clark SM, Shelp BJ. Gamma-hydroxybutyrate accumulation  
407 in Arabidopsis and tobacco plants is a general response to abiotic stress: putative  
408 regulation by redox balance and glyoxylate reductase isoforms. *J Exp Bot* 2008;  
409 59: 2555–64.

410 Baum, G., S Lev-Yadun, S., Fridmann, Y., Arazi, T., Katsnelson, H., Zik, M., and  
411 Fromm, H. (1996). Calmodulin binding to glutamate decarboxylase is required  
412 for regulation of glutamate and GABA metabolism and normal development in  
413 plants. *The EMBO J.* 15, 2988-2996

414 Beemster GT, Vercruyssen S, De VL, et al. The Arabidopsis leaf as a model system for  
415 investigating the role of cell cycle regulation in organ growth. *Journal of Plant*  
416 *Research*, 2006, 119(1):43-50.

## Endoreplication response to GABA deficit

- 417 Bouché N, Fait A, Bouchez D, Møller SG, Fromm H. Mitochondrial  
418 succinic-semialdehyde dehydrogenase of the gamma-aminobutyrate shunt is  
419 required to restrict levels of reactive oxygen intermediates in plants. Proc Natl  
420 Acad Sci USA 2003; 100:6843-8.
- 421 Boudolf V, Vlieghe K, Beemster GT, Magyar Z, Torres Acosta JA, Maes S, Van Der  
422 Schueren E, Inzé D, De Veylder L. (2004). The plant-specific cyclin-dependent  
423 kinase CDKB1;1 and transcription factor E2Fa-DPa control the balance of  
424 mitotically dividing and endoreduplicating cells in Arabidopsis. Plant Cell.  
425 16(10):2683-2692.
- 426 Bown AW, Shelp BJ. Plant GABA: Not Just a Metabolite. Trends Plant Sci. 2016,  
427 21(10):811-813.
- 428 Breuer C, Braidwood L, Sugimoto K. Endocycling in the path of plant development.  
429 Curr Opin Plant Biol. 2014, 17:78-85.
- 430 Breuer C, Ishida T, Sugimoto K. Developmental control of endocycles and cell  
431 growth in plants. Current Opinion in Plant Biology, 2010, 13(6):654-660.
- 432 Brikis CJ, Zarei A, Trobacher CP, DeEll JR, Akama K, Mullen RT, Bozzo GG, Shelp  
433 BJ. Ancient Plant Glyoxylate/Succinic Semialdehyde Reductases: GLYR1s Are  
434 Cytosolic, Whereas GLYR2s Are Localized to Both Mitochondria and Plastids.  
435 Front Plant Sci. 2017; 8: 601.
- 436 Castellano MM, Boniotti MB, Caro E, et al. DNA replication licensing affects cell  
437 proliferation or endoreplication in a cell type-specific manner. The Plant cell,  
438 2004, 16(9): 2380-93.
- 439 Castellano MM, del Pozo JC, Ramirez-Parra E, Brown S, Gutierrez C. Expression and  
440 stability of Arabidopsis CDC6 are associated with endoreplication. Plant Cell.  
441 2001, 13(12):2671-86.
- 442 Churchman ML, Brown ML, Kato N, Kirik V, Hülskamp M, Inzé D, De Veylder L,  
443 Walker JD, Zheng Z, Oppenheimer DG, Gwin T, Churchman J, Larkin JC.  
444 SIAMESE, a plant-specific cell cycle regulator, controls endoreplication onset in  
445 *Arabidopsis thaliana*. Plant Cell. 2006, 18(11):3145-57.

## Endoreplication response to GABA deficit

- 446 Coelho, C., Dante, R. Sabelli, P., Sun, Y., Dilkes, B., Gordon-Kamm, W., and Larkins,  
447 B. (2005). Cyclin-dependent kinase inhibitors in maize endosperm and their  
448 potential role in endoreduplication. *Plant Physiol.* 138, 2323-2336.
- 449 Coleman ST, Fang TK, Rovinsky SA, Turano FJ, Moye-Rowley WS. Expression of a  
450 glutamate decarboxylase homologue is required for normal oxidative stress  
451 tolerance in *Saccharomyces cerevisiae*. *J Biol Chem.* 2001, 276(1):244-50.
- 452 De Veylder L, Larkin JC, Schnittger A. Molecular control and function of  
453 endoreplication in development and physiology. *Trends Plant*  
454 *Sci.* 2011,16(11):624-34.
- 455 De Veylder L., Beeckman T., Beemster G.T.S., Krols L., Terras F., Landrieu I., van  
456 der Schueren E., Maes S., Naudts M., Inze D. (2001). Functional analysis of  
457 cyclin-dependent kinase inhibitors of *Arabidopsis*. *Plant Cell* 13:1653-1667
- 458 Dewitte W, Riou-Khamlichi C, Scofield S, Healy JM, Jacquard A, Kilby NJ, Murray  
459 JA. Altered cell cycle distribution, hyperplasia, and inhibited differentiation in  
460 *Arabidopsis* caused by the D-type cyclin CYCD3. *Plant Cell.* 2003, 15(1):79-92.
- 461 Dewitte W, Scofield S, Alcasabas AA, Maughan SC, Menges M, Braun N, Collins C,  
462 Nieuwland J, Prinsen E, Sundaresan V, Murray JA. *Arabidopsis* CYCD3 D-type  
463 cyclins link cell proliferation and endocycles and are rate-limiting for cytokinin  
464 responses. *Proc Natl Acad Sci USA.* 2007, 104(36):14537-42.
- 465 Dubois M, Selden K, Bediee A, *et al.* SIAMESE-RELATED1 Is Regulated  
466 Posttranslationally and Participates in Repression of Leaf Growth under  
467 Moderate Drought. *Plant physiology*, 2018, 176(4): 2834-50.
- 468 Fait A, Yellin A, Fromm H. GABA shunt deficiencies and accumulation of reactive  
469 oxygen intermediates: insight from *Arabidopsis* mutants. *FEBS Lett.* 2005,  
470 579(2):415-20.
- 471 Fülöp K, Tarayre S, Kelemen Z, Horváth G, Kevei Z, Nikovics K, Bakó L, Brown S,  
472 Kondorosi A, Kondorosi E. *Arabidopsis* anaphase-promoting complexes:  
473 multiple activators and wide range of substrates might keep APC perpetually  
474 busy. *Cell Cycle.* 2005, 4(8):1084-92.

## Endoreplication response to GABA deficit

- 475 Fung-Uceda J, Lee K, Seo PJ, Polyn S, De Veylder L, Mas P. The Circadian Clock  
476 Sets the Time of DNA Replication Licensing to Regulate Growth in Arabidopsis.  
477 Dev Cell. 2018, 45 (1):101-113.
- 478 Häusler RE, Ludewig F, Krueger S. Amino acids--a life between metabolism and  
479 signaling. Plant Sci. 2014, 229:225-237.
- 480 Heyman J, Polyn S, Eekhout T, De Veylder L. Tissue-Specific Control of the  
481 Endocycle by the Anaphase Promoting Complex/Cyclosome Inhibitors UVI4  
482 and DEL1. Plant Physiol. 2017, 175(1):303-313.
- 483 Jacoby RP, Taylor NL, Millar AH. The role of mitochondrial respiration in salinity  
484 tolerance. Trends Plant Sci 2011; 16:614–23.
- 485 Jun SE, Okushima Y, Nam J, Umeda M, Kim GT. Kip-related protein 3 is required  
486 for control of endoreduplication in the shoot apical meristem and leaves of  
487 *Arabidopsis*. Mol Cells. 2013, 35(1):47-53.
- 488 Kumar N, Harashima H, Kalve S, Bramsiepe J, Wang K, Sizani BL, Bertrand LL,  
489 Johnson MC, Faulk C, Dale R, Simmons LA, Churchman ML, Sugimoto K,  
490 Kato N, Dasanayake M, Beemster G, Schnittger A, Larkin JC. Functional  
491 Conservation in the SIAMESE-RELATED Family of Cyclin-Dependent Kinase  
492 Inhibitors in Land Plants. Plant Cell. 2015, 27(11):3065-80.
- 493 Lammens T, Li J, Leone G, et al. Atypical E2Fs: new players in the E2F transcription  
494 factor family. Trends in Cell Biology, 2009, 19(3):111-118.
- 495 Liu CL, Zhao L, Yu GH. (2011). The dominant glutamic acid metabolic influx to  
496 produce  $\gamma$ -amino butyric acid over proline in *Nicotiana tabacum* leaves under  
497 water stress relates to its significant role of antioxidant activity. Integr. Plant Biol.  
498 53:608-618.
- 499 Masubelele NH, Dewitte W, Menges M, Maughan S, Collins C, Huntley R,  
500 Nieuwland J, Scofield S, Murray JA. D-type cyclins activate division in the root  
501 apex to promote seed germination in Arabidopsis. Proc Natl Acad Sci USA.  
502 2005, 25; 102(43):15694-9.

## Endoreplication response to GABA deficit

- 503 Matsunaga, S., Katagiri, Y., Nagashima, Y., Sugiyama, T., Hasegawa, J., Hayashi, K.  
504 and Sakamoto, T. (2013). New insights into the dynamics of plant cell nuclei and  
505 chromosomes. *Int. Rev. Cell Mol. Biol.* 305, 253-301.
- 506 Melaragno J E, Mehrotra B, Coleman A W. Relationship between Endopolyploidy  
507 and Cell Size in Epidermal Tissue of *Arabidopsis*. *Plant Cell*, 1993,  
508 5(11):1661-1668
- 509 Michaeli S, Fait A, Lagor K, Nunes-Nesi A, Grillich N, Yellin A, et al. A  
510 mitochondrial GABA permease connects the GABA shunt and the TCA cycle,  
511 and is essential for normal carbon metabolism. *Plant J* 2011; 67:485–498.
- 512 Nowack MK, Harashima H, Dissmeyer N, *et al.* Genetic framework of  
513 cyclin-dependent kinase function in *Arabidopsis*. *Developmental cell*, 2012,  
514 22(5): 1030-40.
- 515 Palanivelu R, Brass L, Edlund AF, Preuss D. Pollen tube growth and guidance is  
516 regulated by POP2, an *Arabidopsis* gene that controls GABA levels. *Cell*. 2003,  
517 114(1):47-59.
- 518 Podlešáková K, Ugena L, Spíchal L, Doležal K, De Diego N. Phytohormones and  
519 polyamines regulate plant stress responses by altering GABA pathway. *New*  
520 *Biotechnol.* 2019, 48:53-65.
- 521 Ramesh SA, Tyerman SD, Gilliam M, Xu B.  $\gamma$ -Aminobutyric acid (GABA)  
522 signalling in plants. *Cell Mol Life Sci.* 2017, 74(9):1577-1603.
- 523 Renault H, El Amrani A, Berger A, Mouille G, Soubigou-Taconnat L, Bouchereau A,  
524 et al.  $\gamma$ -Aminobutyric acid transaminase deficiency impairs central carbon  
525 metabolism and leads to cell wall defects during salt stress in *Arabidopsis* roots.  
526 *Plant Cell Environ* 2013; 36:1009–18.
- 527 Renault H, El Amrani A, Palanivelu R, Updegraff EP, Yu A, Renou JP, Preuss D,  
528 Bouchereau A, Deleu C. GABA accumulation causes cell elongation defects and  
529 a decrease in expression of genes encoding secreted and cell wall-related proteins  
530 in *Arabidopsis thaliana*. *Plant Cell Physiol.* 2011, 52(5):894-908.

## Endoreplication response to GABA deficit

- 531 Sawa S, Watanabe K, Goto K, Liu YG, Shibata D, Kanaya E, Morita EH, Okada K.  
532 FILAMENTOUS FLOWER, a meristem and organ identity gene of *Arabidopsis*,  
533 encodes a protein with a zinc finger and HMG-related domains. *Genes Dev.* 1999,  
534 13(9):1079-88.
- 535 Schippers JH, Foyer CH, Van Dongen JT. Redox regulation in shoot growth, SAM  
536 maintenance and flowering. *Current Opinion in Plant Biology*, 2016,  
537 29:121-128.
- 538 Seifikalhor M, AliniaEIFard S, Hassani B, Niknam V & Lastochkina O. (2019).  
539 Diverse role of  $\gamma$ -aminobutyric acid in dynamic plant cell responses. *Plant Cell*  
540 *Reports*. 38(8):847-867.
- 541 Siegfried KR, Eshed Y, Baum SF, Otsuga D, Drews GN, Bowman JL. Members of  
542 the YABBY gene family specify abaxial cell fate in *Arabidopsis*. *Development*.  
543 1999, 126(18):4117-28.
- 544 Toyokura K, Hayashi M, Nishimura M, and Okada K. Adaxial-abaxial patterning: a  
545 novel function of the GABA shunt. *Plant Signal Behav.* 2012, 7 (7):705-7.
- 546 Toyokura K, Watanabe K, OiWaka A, Kusano M, Tameshige T, Tatematsu K,  
547 Matsumoto N, Tsugeki R, Saito K, Okada K. Succinic semialdehyde  
548 dehydrogenase is involved in the robust patterning of *Arabidopsis* leaves along  
549 the adaxial-abaxial axis. *Plant Cell Physiol.* 2011, 52(8):1340-53.
- 550 Umeda M, Aki SS, Takahashi N. Gap 2 phase: making the fundamental decision to  
551 divide or not. *Curr Opin Plant Biol.* 2019, 51:1-6.
- 552 Verkest A, Manes CL, Vercruyssen S, Maes S, Van Der Schueren E, Beeckman T,  
553 Genschik P, Kuiper M, Inzé D, De Veylder L (2005). The cyclin-dependent  
554 kinase inhibitor KRP2 controls the onset of the endoreduplication cycle during  
555 *Arabidopsis* leaf development through inhibition of mitotic CDKA; 1 kinase  
556 complexes. *Plant Cell.* 2005, 17(6):1723-1736.
- 557 Vlieghe K, Boudolf V, Beemster G T, et al. (2005). The DP-E2F-like Gene DEL1,  
558 Controls the Endocycle in *Arabidopsis thaliana*. *Current Biology*, 15(1):59-63.



## Endoreplication response to GABA deficit

559 Watkins JM, Chapman JM, Muday GK (2017). Abscisic Acid-Induced Reactive  
560 Oxygen Species Are Modulated by Flavonols to Control Stomata Aperture. *Plant*  
561 *Physiol.* 175(4):1807-1825.

562 Yang K, Wang H, Xue S, *et al.* Requirement for A-type cyclin-dependent kinase and  
563 cyclins for the terminal division in the stomatal lineage of *Arabidopsis*. *J Exp*  
564 *Bot*, 2014, 65(9): 2449-2461.

565 Yi D, Alvim Kamei CL, Cools T, Vanderauwera S, Takahashi N, Okushima Y,  
566 Eekhout T, Yoshiyama KO, Larkin J, Van den Daele H, Conklin P, Britt A,  
567 Umeda M, De Veylder L. The *Arabidopsis* SIAMESE-RELATED  
568 cyclin-dependent kinase inhibitors SMR5 and SMR7 regulate the DNA damage  
569 checkpoint in response to reactive oxygen species. *Plant Cell.* 2014,  
570 26(1):296-309.

### 571 **Figure Legends**

572 **Figure 1.** Leaf area of  $\gamma$ -Aminobutyric acid (GABA) biosynthetic mutants was larger  
573 than that of wild-type *Arabidopsis*.

574 Top view of leaves at 8 d after stratification of A. wild type; B. *gad1* mutant, C. *gad2*  
575 mutant and D. *gad1/gad2* mutants; E. Leaf growth curve of GABA mutants and wild  
576 type of *Arabidopsis* in the early stage (from 4–8 d after stratification). Results are  
577 presented as averages  $\pm$  SE of three separate experiments (n = 15). Bar in A–D = 860  
578  $\mu$ m.

579 **Figure 2.** Epidermal cell size in the first true leaves of  $\gamma$ -Aminobutyric acid (GABA)  
580 biosynthetic mutants was larger than that of wild-type *Arabidopsis* at the early growth  
581 stage.

582 Epidermal cell of A. wild type; B. *gad1* mutant, C. *gad2* mutant and D. *gad1/gad2*  
583 mutants; E. Cell size comparison among GABA mutants and wild type of *Arabidopsis*  
584 in the early stage (7–9 d after stratification). Results are presented as averages  $\pm$  SE of  
585 60 cells calculated across three separate experimental replicates. Asterisks represent  
586 significant differences between the mutants and the wild type ( $P < 0.05$ ) and were  
587 determined using one-way ANOVA. Bar in A–D = 55  $\mu$ m.

588 **Figure 3.** Octoploid (8n) cells occurred earlier in biosynthetic mutants than that in the  
589 wild type. Top panel: DNA ploidy analysis in leaf early growth stage (7–8 days after  
590 stratification) between  $\gamma$ -Aminobutyric acid (GABA) biosynthetic mutants and the  
591 wild type. Left bottom panel: DNA ploidy analysis in leaf middle-late stage (21 days  
592 after stratification) between GABA mutants and the control. Right bottom panel: 8C  
593 percentage comparison among mutants and the wild type during the long growth  
594 period.

## Endoreplication response to GABA deficit

595 **Figure 4.** Expression of *Cyclin D* components in biosynthetic mutants was lower than  
596 that in the wild type at the 8<sup>th</sup> day after stratification. Results are presented as averages  
597  $\pm$  SE of triplicate experiments. Asterisks represent significant differences between the  
598 mutants and the wild type ( $*P < 0.05$ ;  $** P < 0.01$ ) and were determined using  
599 one-way ANOVA.

600 **Figure 5.** Expression of *CDA;1* and *E2Fa* in biosynthetic mutants was lower than that  
601 in the wild type at the 8<sup>th</sup> day after stratification. Results are presented as averages  $\pm$   
602 SE of three independent experimental replicates. Asterisks represent significant  
603 differences between the mutants and the wild type ( $*P < 0.05$ ;  $** P < 0.01$ ) and were  
604 determined using one-way ANOVA.

605 **Figure 6.** Expression of *CCS52A* and *CDC6* in biosynthetic mutants was higher than  
606 that in the wild type at the 8<sup>th</sup> day after stratification. Results are presented as averages  
607  $\pm$  SE of three independent experimental replicates. Asterisks represent significant  
608 differences between the mutants and the wild type ( $*P < 0.05$ ;  $** P < 0.01$ ) and were  
609 determined using one-way ANOVA.

610 **Figure 7.** Expression of *SIAMESE (SIM)* and *SIAMESE-RELATED (SMR)*  
611 components in biosynthetic mutants was higher than that in the wild type at the 8<sup>th</sup>  
612 day after stratification. Results are presented as averages  $\pm$  SE of three independent  
613 experimental replicates. Asterisks represent significant differences between the  
614 mutants and the wild type ( $*P < 0.05$ ;  $** P < 0.01$ ). Statistics were determined using  
615 one-way ANOVA.

616 **Figure 8.** Reactive oxygen species (ROS) level in guard cells (GCs) of  
617  $\gamma$ -Aminobutyric acid (GABA) mutants are higher than that of control A–D. DCF  
618 fluorescence (green) in epidermal GCs of GABA biosynthetic mutants and wild type  
619 Arabidopsis. E. DCF fluorescence was quantified in the mutants and control. Results  
620 are presented as averages  $\pm$  SE of three separate experiments ( $n = 16$ ). Asterisks  
621 represent significant differences between the mutant and the wild type ( $P < 0.05$ ) and  
622 were determined using one-way ANOVA. Bar in A–D = 55  $\mu$ m.

623 **Figure 9.** Working hypothesis of  $\gamma$ -Aminobutyric acid (GABA) negatively control the  
624 endoreplication of Arabidopsis leaves.

625 GABA, as a normal metabolic signal and antioxidant, effectively inhibits reactive  
626 oxygen species (ROS) production. In the GABA biosynthetic mutants, owing to  
627 biosynthetic perturbation, the inhibition of GABA on ROS was relieved. The  
628 production of ROS promotes the expression of *SIAMESE (SIM)* and  
629 *SIAMESE-RELATED (SMR)*. Both components are inhibitors of Cyclin-dependent  
630 Kinase complexes (e.g. *CYC3;1-CDKA;1*), and low levels of kinases initiate  
631 endoreplication in Arabidopsis. Other components, such as *CDC6*, synergistically  
632 respond to low levels of GABA to prime endoreplication. In the wild type, the normal  
633 metabolism of GABA delays endoreplication and prevents premature endoreplication.

### 634 **Supporting Materials**

635 **Table S1.** The primers of the genes involved in cell cycle regulation, endocycle  
636 initiation, progression, and exit.

637 **Figure S1.** The  $\gamma$ -Aminobutyric acid (GABA) analysis was performed on whole-shoot  
638 samples. Results are presented as averages  $\pm$  standard error (SE) of three independent

### Endoreplication response to GABA deficit

639 replicates. Significant differences from the control are indicated with asterisks: \*  $P$   
640  $< 0.05$ , \*\*  $P < 0.01$ , by one-way ANOVA.

641

## Endoreplication response to GABA deficit

642

643

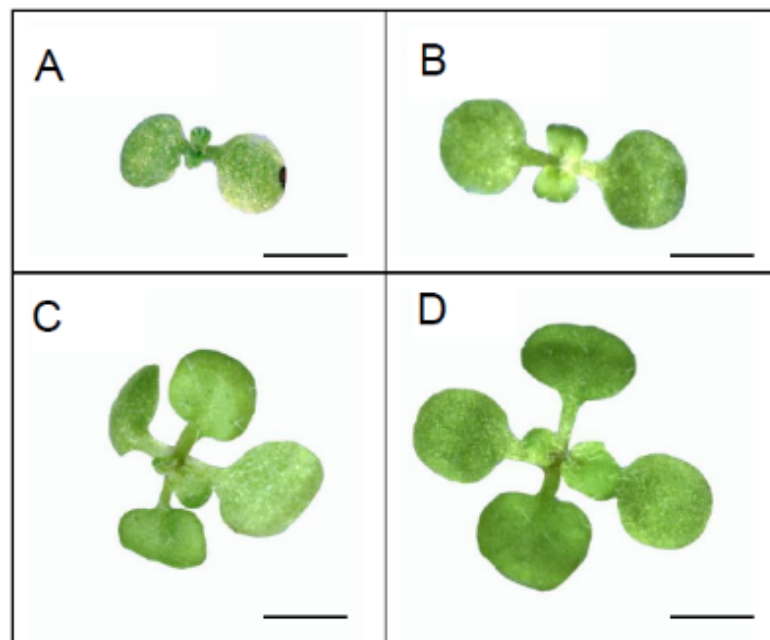

644

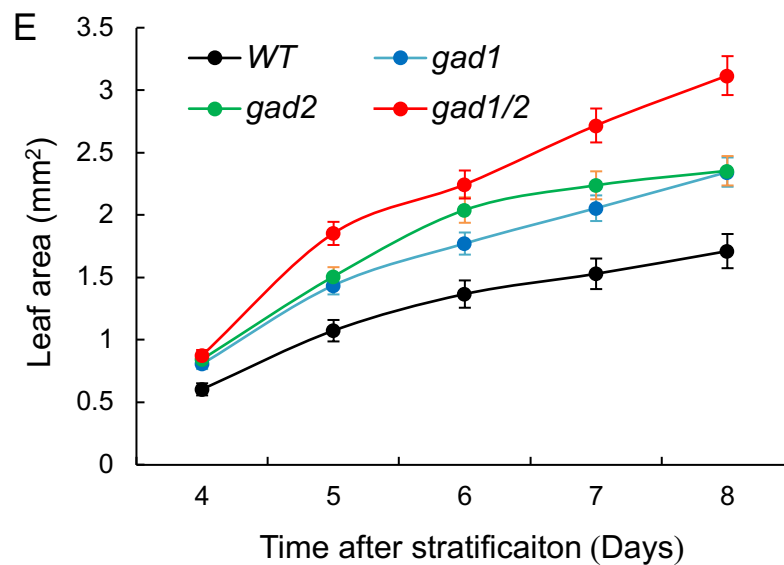

645

646 **Figure 1.** Leaf area of  $\gamma$ -Aminobutyric acid (GABA) biosynthetic mutants was larger  
647 than that of wild-type Arabidopsis.

648 Top view of leaves at 8 d after stratification of A. wild type; B. *gad1* mutant, C. *gad2*  
649 mutant and D. *gad1/gad2* mutants; E. Leaf growth curve of GABA mutants and wild  
650 type of Arabidopsis in the early stage (from 4–8 d after stratification). Results are  
651 presented as averages  $\pm$  SE of three separate experiments (n = 15). Bar in A–D = 860  
652  $\mu$ m.

653

## Endoreplication response to GABA deficit

654

655

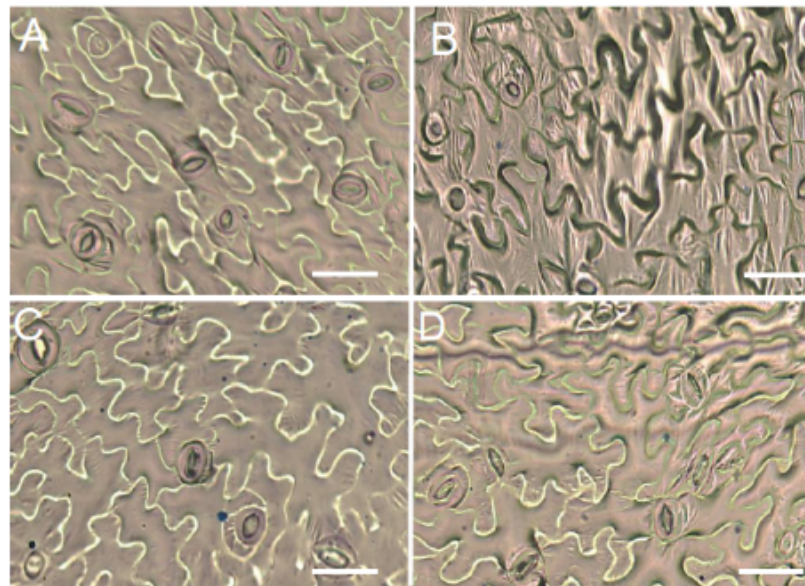

656

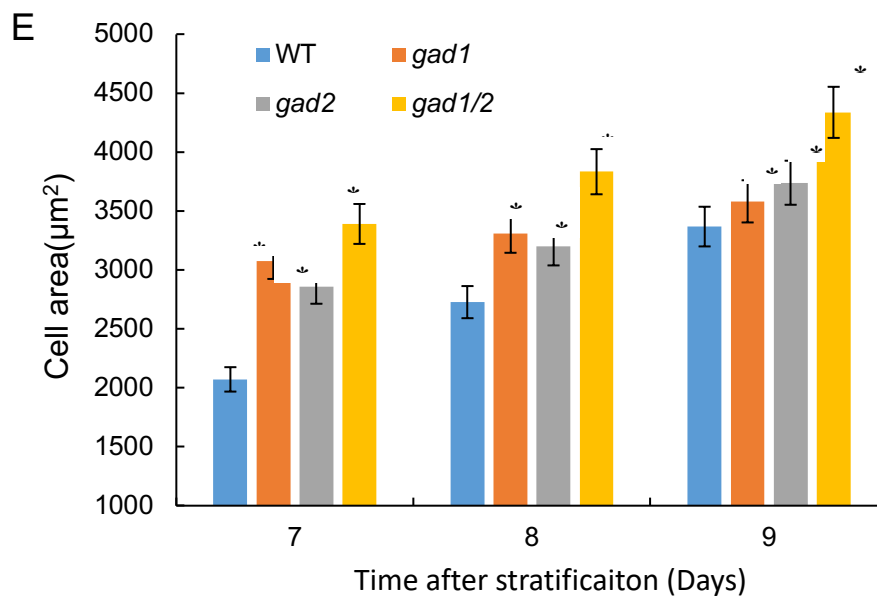

657

658 **Figure 2.** Epidermal cell size in the first true leaves of  $\gamma$ -Aminobutyric acid (GABA)  
659 biosynthetic mutants was larger than that of wild-type Arabidopsis at the early growth  
660 stage.

661 Epidermal cell of A. wild type; B. *gad1* mutant, C. *gad2* mutant and D. *gad1/gad2*  
662 mutants; E. Cell size comparison among GABA mutants and wild type of Arabidopsis  
663 in the early stage (7–9 d after stratification). Results are presented as averages  $\pm$  SE of  
664 60 cells calculated across three separate experimental replicates. Asterisks represent

## Endoreplication response to GABA deficit

665 significant differences between the mutants and the wild type ( $P < 0.05$ ) and were  
666 determined using one-way ANOVA. Bar in A–D = 55  $\mu\text{m}$ .

667

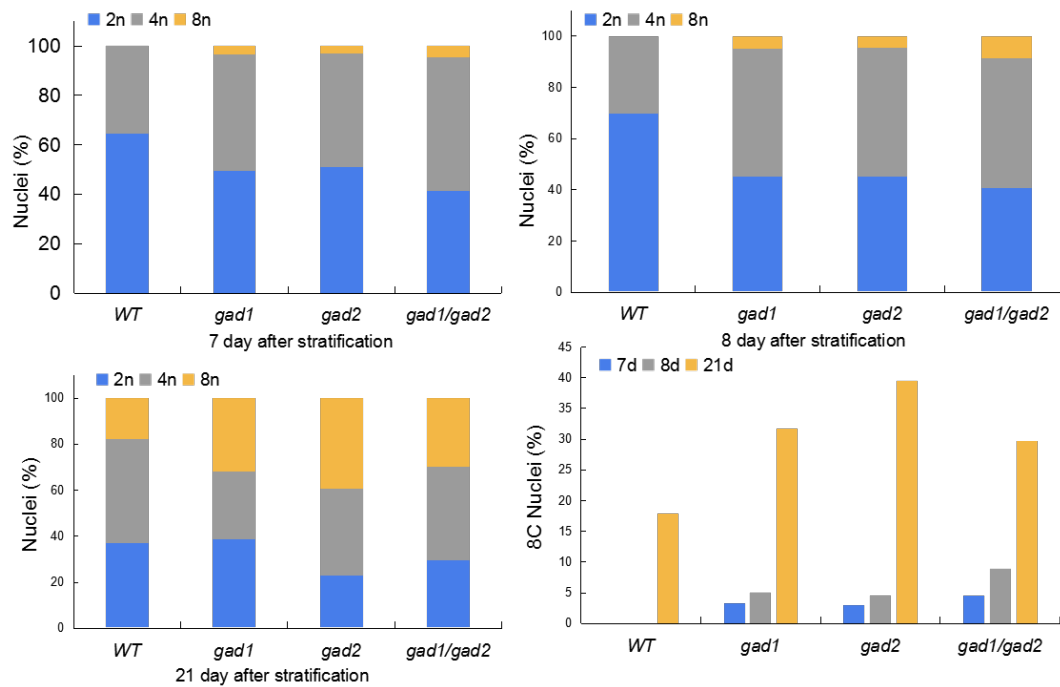

668

669 **Figure 3.** Octoploid (8n) cells occurred earlier in biosynthetic mutants than that in the  
670 wild type. Top panel: DNA ploidy analysis in leaf early growth stage (7–8 days after  
671 stratification) between  $\gamma$ -Aminobutyric acid (GABA) biosynthetic mutants and the  
672 wild type. Left bottom panel: DNA ploidy analysis in leaf middle-late stage (21 days  
673 after stratification) between GABA mutants and the control. Right bottom panel: 8C  
674 percentage comparison among mutants and the wild type during the long growth  
675 period.

676

677

## Endoreplication response to GABA deficit

678

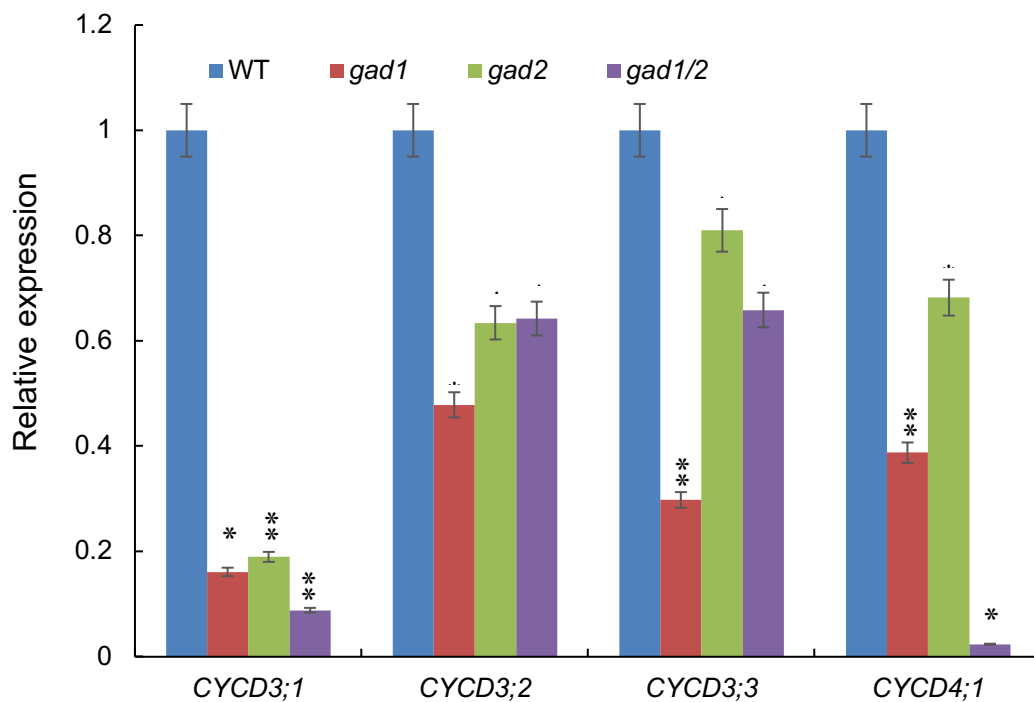

679

680 **Figure 4.** Expression of *Cyclin D* components in biosynthetic mutants was lower than  
681 that in the wild type at the 8<sup>th</sup> day after stratification. Results are presented as averages  
682  $\pm$  SE of triplicate experiments. Asterisks represent significant differences between the  
683 mutants and the wild type (\* $P$  < 0.05; \*\*  $P$  < 0.01) and were determined using  
684 one-way ANOVA.

685

## Endoreplication response to GABA deficit

686

687

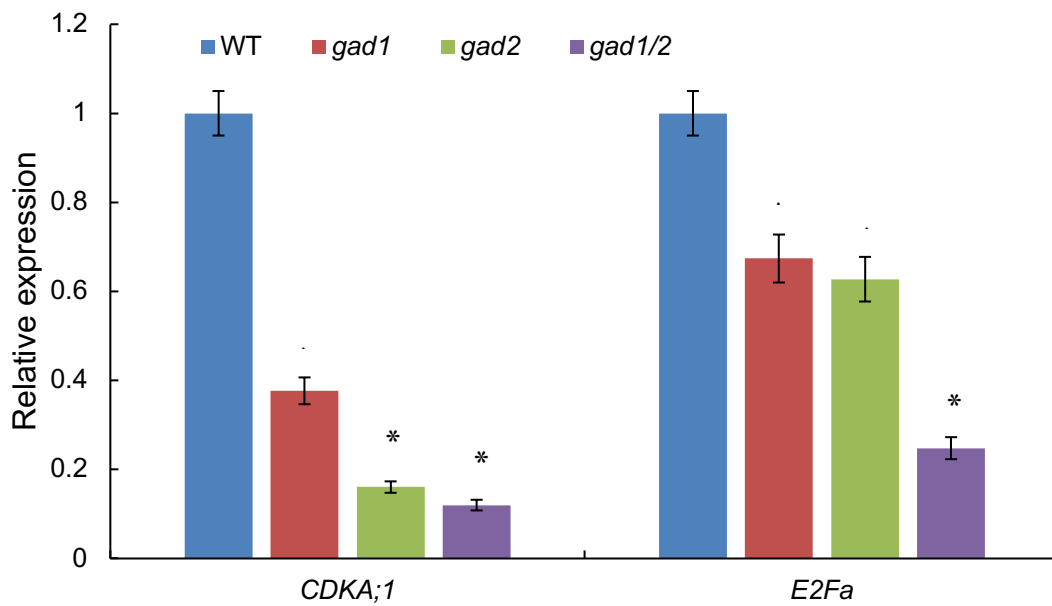

688

689 **Figure 5.** Expression of *CDKA;1* and *E2Fa* in biosynthetic mutants was lower than that  
690 in the wild type at the 8<sup>th</sup> day after stratification. Results are presented as averages  $\pm$   
691 SE of three independent experimental replicates. Asterisks represent significant  
692 differences between the mutants and the wild type (\* $P < 0.05$ ; \*\*  $P < 0.01$ ) and were  
693 determined using one-way ANOVA.

694



## Endoreplication response to GABA deficit

695

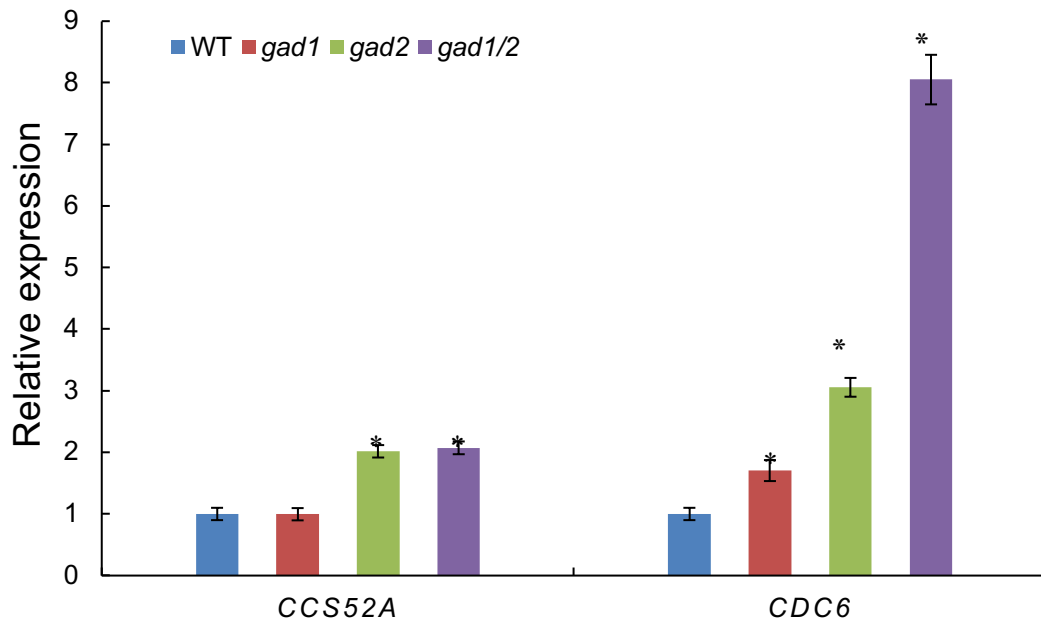

696

697

698 **Figure 6.** Expression of *CCS52A* and *CDC6* in biosynthetic mutants was higher than  
699 that in the wild type at the 8<sup>th</sup> day after stratification. Results are presented as averages  
700  $\pm$  SE of three independent experimental replicates. Asterisks represent significant  
701 differences between the mutants and the wild type (\**P* < 0.05; \*\**P* < 0.01) and were  
702 determined using one-way ANOVA.

703

704

705

## Endoreplication response to GABA deficit

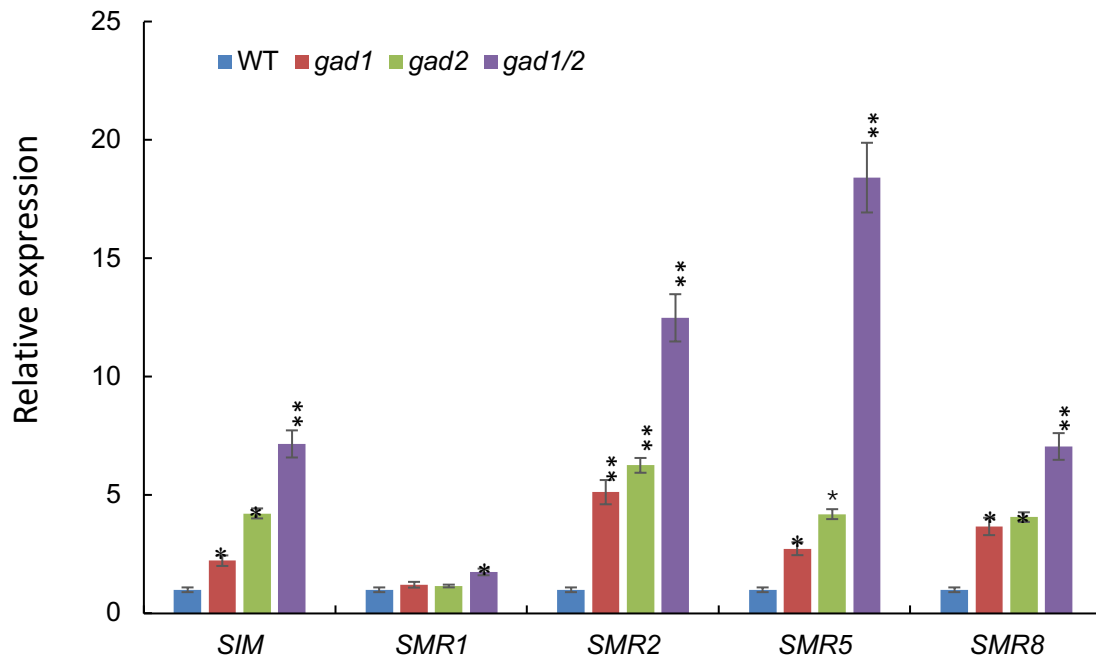

706

707

Figure 7. Relative expression of *SIM* gene

708 **Figure 7.** Expression of *SIAMESE* (*SIM*) and *SIAMESE-RELATED* (*SMR*)  
709 components in biosynthetic mutants was higher than that in the wild type at the 8<sup>th</sup>  
710 day after stratification. Results are presented as averages  $\pm$  SE of three independent  
711 experimental replicates. Asterisks represent significant differences between the  
712 mutants and the wild type (\* $P$  < 0.05; \*\*  $P$  < 0.01). Statistics were determined using  
713 one-way ANOVA.

714

## Endoreplication response to GABA deficit

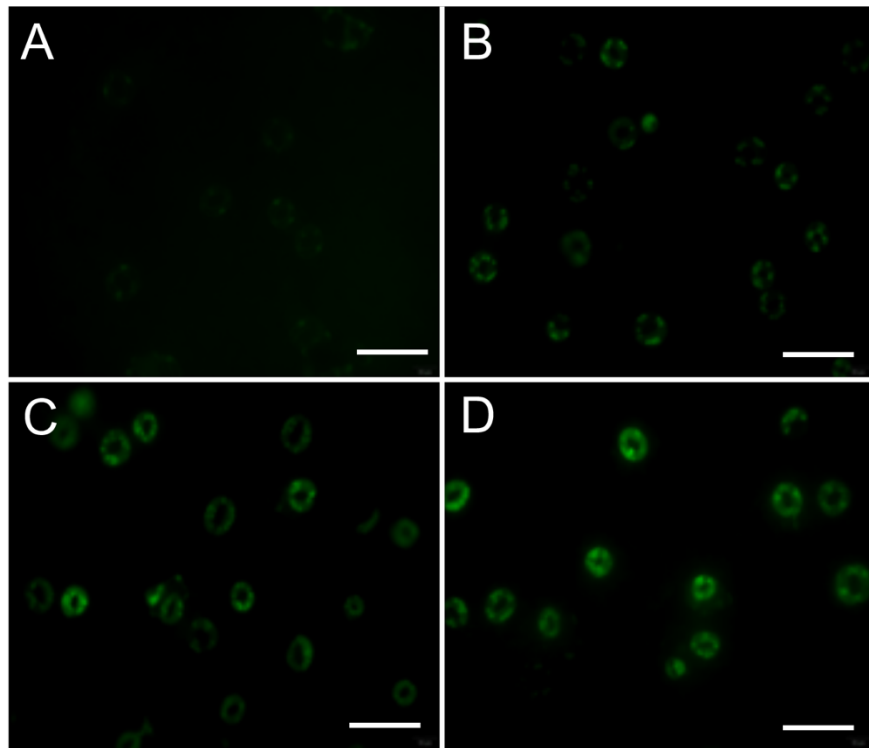

715

716

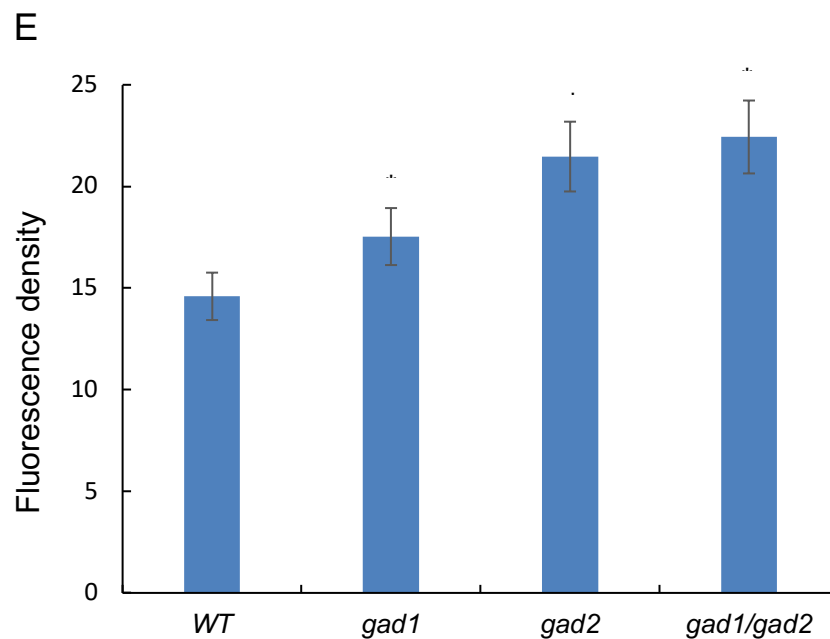

717

718 **Figure 8.** Reactive oxygen species (ROS) level in guard cells (GCs) of  
719  $\gamma$ -Aminobutyric acid (GABA) mutants are higher than that of control A–D. DCF  
720 fluorescence (green) in epidermal GCs of GABA biosynthetic mutants and wild type  
721 Arabidopsis. E. DCF fluorescence was quantified in the mutants and control. Results  
722 are presented as averages  $\pm$  SE of three separate experiments ( $n = 16$ ). Asterisks

### **Endoreplication response to GABA deficit**

723 represent significant differences between the mutant and the wild type ( $P < 0.05$ ) and  
724 were determined using one-way ANOVA. Bar in A–D = 55  $\mu\text{m}$ .

725

## Endoreplication response to GABA deficit

726

727

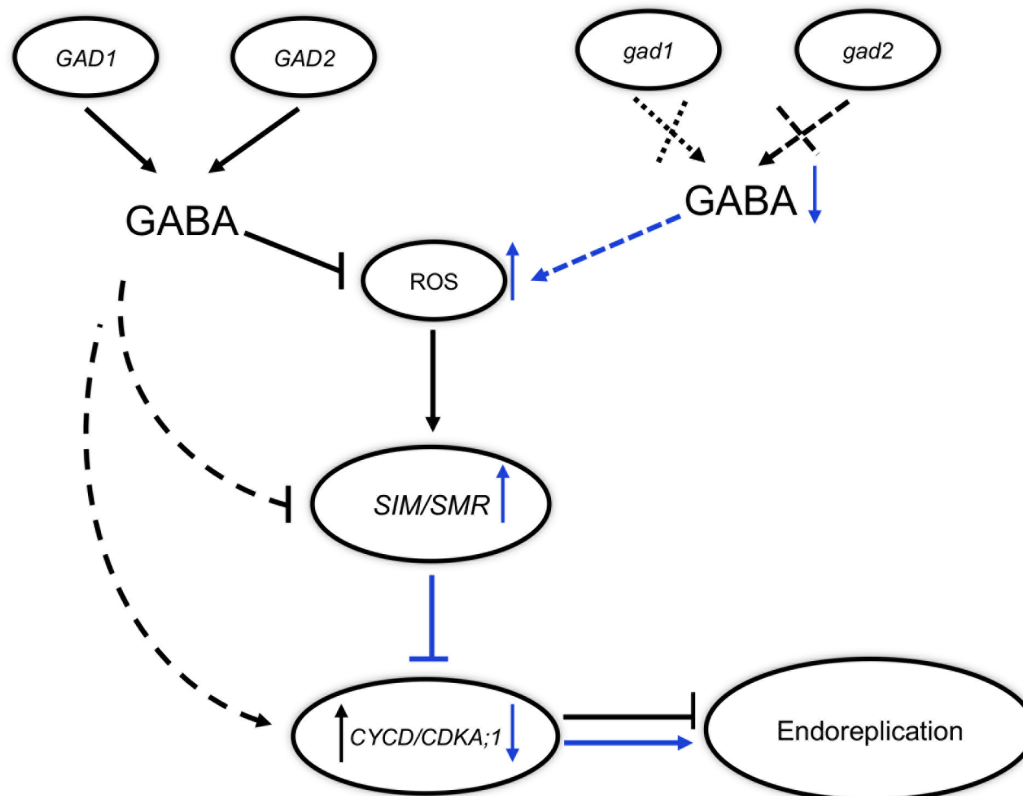

728

729 **Figure 9.** Working hypothesis of  $\gamma$ -Aminobutyric acid (GABA) negatively control the  
730 endoreplication of Arabidopsis leaves.

731 GABA, as a normal metabolic signal and antioxidant, effectively inhibits reactive  
732 oxygen species (ROS) production. In the GABA biosynthetic mutants, owing to  
733 biosynthetic perturbation, the inhibition of GABA on ROS was relieved. The  
734 production of ROS promotes the expression of *SIAMESE* (*SIM*) and  
735 *SIAMESE-RELATED* (*SMR*). Both components are inhibitors of Cyclin-dependent  
736 Kinase complexes (e.g. CYC3;1-CDKA;1), and low levels of kinases initiate  
737 endoreplication in Arabidopsis. Other components, such as CDC6, synergistically  
738 respond to low levels of GABA to prime endoreplication. In the wild type, the normal  
739 metabolism of GABA delays endoreplication and prevents premature endoreplication.

740

741

742

## Endoreplication response to GABA deficit

### 743 Supporting Materials

744 [Table S1](#): The primers of the genes involved in cell cycle regulation, endocycle  
745 initiation, progression and exit.

| Locus tag | Gene name      | Primer        | Primer sequences          |
|-----------|----------------|---------------|---------------------------|
| AT3G02780 | <i>IPP2</i>    | IPP2_EXP_F    | CATGCGACACACCAACACCA      |
|           |                | IPP2_EXP_R    | TGAGGCGAATCAATGGGAGA      |
| AT4G34160 | <i>CYCD3;1</i> | CYCD3;1_EXP_F | CCTCTCTGTAATCTCCGATTC     |
|           |                | CYCD3;1_EXP_R | AAGGACACCGAGGAGATTAG      |
| AT5G67260 | <i>CYCD3;2</i> | CYCD3;2_EXP_F | TCTCAGCTTGTTGCTGTGGCTTC   |
|           |                | CYCD3;2_EXP_R | TCTTGCTTCTTCCACTTGGAGGTC  |
| AT3G50070 | <i>CYCD3;3</i> | CYCD3;3_EXP_F | TCCGATCGGTGTGTTTGTATGCG   |
|           |                | CYCD3;3_EXP_R | GCAGACACAACCCACGACTCATTC  |
| AT5G65420 | <i>CYCD4;1</i> | CYCD4;1_EXP_F | GAAGGAGAAGCAGCATTTGCCAAG  |
|           |                | CYCD4;1_EXP_R | ACTGGTGTACTTCACAAGCCTTCC  |
| AT4G11920 | <i>CCS52A2</i> | CCS52A2_EXP_F | CGTAGATACCAACAGCCAGGTGTG  |
|           |                | CCS52A2_EXP_R | CGTGTGTGCTCACAAGCTCATTC   |
| AT2G29680 | <i>CDC6</i>    | CDC6_EXP_F    | AGGCTCTATGTGTCTGCAGGAG    |
|           |                | CDC6_EXP_R    | ACCACTTGACACTCTGGAAGTGG   |
| AT2G31270 | <i>CDT1a</i>   | CDT1a_EXP_F   | AATCGCTCTTCGGAAAGTGTTCG   |
|           |                | CDT1a_EXP_R   | CCTCTGGAACTTCATCACCCTGAG  |
| AT3G48750 | <i>CDKA;1</i>  | CDKA;1_EXP_F  | ACTGGCCAGAGCATTCCGGTATC   |
|           |                | CDKA;1_EXP_R  | TCGGTACCAGAGAGTAACAACCTC  |
| AT2G36010 | <i>E2Fa</i>    | E2Fa_EXP_F    | TAGATCGGGAGGAAGATGCTGTCCG |

## Endoreplication response to GABA deficit

---

|           |             |            |                           |
|-----------|-------------|------------|---------------------------|
|           |             | E2Fa_EXP_R | TTGTCGCCTTCTCTTTTCGTGAAG  |
| AT2G23430 | <i>KRP1</i> | KRP1_EXP_F | ACGGAGCCGGAGAATTGTTTATG   |
|           |             | KRP1_EXP_R | CGAAACTCCATTATCACCGACGAC  |
| AT3G50630 | <i>KRP2</i> | KRP2_EXP_F | TAGGAGATTATGGCGGCGTTAGG   |
|           |             | KRP2_EXP_R | TTTCACCGTCGTCGTCGTAACTC   |
| AT2G32710 | <i>KRP4</i> | KRP4_EXP_F | AAGCTTCAACAGGACCACAAGGG   |
|           |             | KRP4_EXP_R | GGGTTGTCATGATTCAGGCCTTC   |
| AT1G49620 | <i>KRP7</i> | KRP7_EXP_F | GAGGCTCATGAAATCTCCGAAACC  |
|           |             | KRP7_EXP_R | CCGAGTCCATTTCTGCTGTTTCTC  |
| AT5G04470 | <i>SIM</i>  | SIM_EXP_F  | AGCCATCAAGATCCGAGCCAAC    |
|           |             | SIM_EXP_R  | TTGTGGTTCGGAAGAAGTGGGAGTG |
| AT3G10525 | <i>SMR1</i> | SMR1_EXP_F | CAAAGAAGGACGAAGGTGATGACG  |
|           |             | SMR1_EXP_R | TGTTCTTGGGATGTGGGTGTGC    |
| AT1G60783 | <i>SMR2</i> | SMR2_EXP_F | TCACAAGATTCCGGAGGTGGAGAC  |
|           |             | SMR2_EXP_R | ATCTCACGCGGTCGCTTTCTTG    |
| AT1G07500 | <i>SMR5</i> | SMR5_EXP_F | ACGCCTACACGTGATGATTGCC    |
|           |             | SMR5_EXP_R | TATCCCTTCTTCGGTGGTTCCC    |
| AT1G10690 | <i>SMR8</i> | SMR8_EXP_F | GCGGTTTCCGTCAGAATTCCAAG   |
|           |             | SMR8_EXP_R | GCACTTCAACGACGGTTTACGC    |

---

746

747

## Endoreplication response to GABA deficit

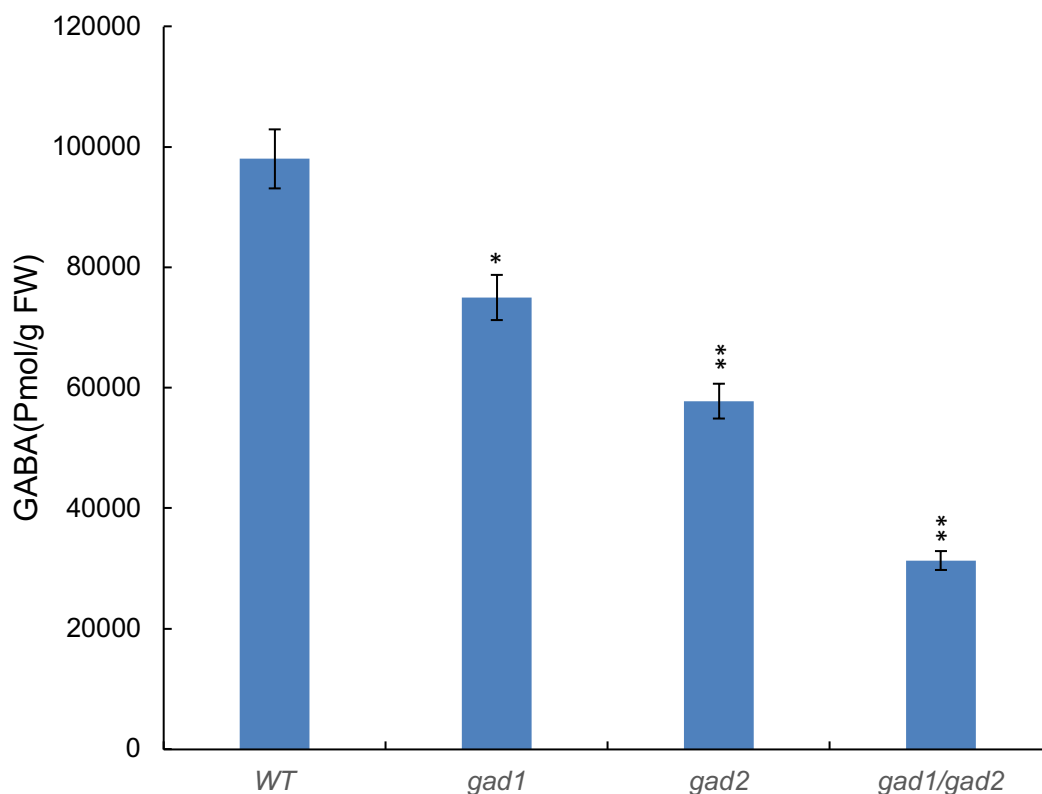

748

749 **Figure S1:** GABA analysis was performed on whole shoot samples. Averages  $\pm$   
750 standard error (SE) of three independent replicates. Significant differences from  
751 the control are indicated with asterisks: \*  $P < 0.05$ , \*\*  $P < 0.01$ , by one-way  
752 ANOVA.

753

754 GABA levels in the leaves of the mutants were determined essentially as  
755 described earlier (Allan and Shelp 2006).

756

757 Allan WL, Simpson JP, Clark SM, Shelp BJ. Gamma-hydroxybutyrate  
758 accumulation in Arabidopsis and tobacco plants is a general response to abiotic  
759 stress: putative regulation by redox balance and glyoxylate reductase isoforms. J  
760 Exp Bot 2008; 59: 2555–64.

761
